# Supplementary material for: A study on the impact of water quality on the murrel fishChanna striataandChanna punctatafrom three major Southern Tamilnadu rivers, India
Source: Royal Society of Chemistry journal article supplement (doi:10.1039/c7ra13583a), 2018-01-01
Supplement: c7ra13583a1.pdf [file c7ra13583a1.pdf]

Table 1. Bioaccumulation of heavy metals ( $\mu\text{g/g}$ ) in *Channa striata* pre-monsoon (2015)

| S. No | Heavy metals | Sample | Cauvery   |           |           | Thamirabarani |           |           | Vaigai    |           |           |
|-------|--------------|--------|-----------|-----------|-----------|---------------|-----------|-----------|-----------|-----------|-----------|
|       |              |        | L         | M         | H         | L             | M         | H         | L         | M         | H         |
| 1     | As           | Gills  | 0.02±0.01 | 0.06±0.01 | 0.10±0.01 | 0.37±0.08     | 0.22±0.01 | 0.37±0.07 | 0.10±0.01 | 0.16±0.02 | 0.24±0.01 |
|       |              | Kidney | 0.02±0.01 | 0.02±0.01 | 0.10±0.03 | 0.42±0.21     | 0.39±0.05 | 0.18±0.05 | 0.08±0.01 | 0.10±0.01 | 0.66±0.81 |
|       |              | Liver  | 0.03±0.01 | 0.03±0.01 | 0.12±0.04 | 0.16±0.07     | 0.11±0.04 | 0.27±0.08 | 0.06±0.01 | 0.09±0.01 | 0.11±0.03 |
|       |              | Muscle | BDL       | BDL       | 0.02±0.01 | 0.05±0.02     | 0.10±0.03 | 0.11±0.02 | 0.02±0.01 | 0.03±0.01 | 0.04±0.04 |
| 2     | Cd           | Gills  | 0.03±0.01 | 0.04±0.01 | 0.03±0.02 | 0.02±0.01     | 0.02±0.01 | BDL       | 0.02±0.01 | 0.02±0.01 | 0.03±0.02 |
|       |              | Kidney | 0.04±0.02 | 0.07±0.04 | 0.05±0.02 | BDL           | BDL       | BDL       | BDL       | BDL       | BDL       |
|       |              | Liver  | BDL       | 0.03±0.01 | 0.03±0.01 | BDL           | BDL       | BDL       | BDL       | BDL       | BDL       |
|       |              | Muscle | BDL       | 0.02±0.01 | 0.05±0.01 | BDL           | BDL       | BDL       | BDL       | BDL       | BDL       |
| 3     | Cr           | Gills  | 1.09±0.16 | 1.12±0.16 | 1.24±0.04 | 0.19±0.06     | 0.72±0.04 | 3.07±0.08 | 0.91±0.05 | 1.04±0.08 | 1.34±0.12 |
|       |              | Kidney | 0.82±0.10 | 1.01±0.12 | 0.84±0.07 | 0.18±0.06     | 0.41±0.06 | 1.18±0.08 | 0.81±0.03 | 0.87±0.01 | 1.05±0.19 |
|       |              | Liver  | 0.41±0.02 | 0.85±0.15 | 0.89±0.11 | 0.31±0.14     | 0.32±0.06 | 0.87±0.16 | 0.66±0.04 | 0.73±0.01 | 1.19±0.02 |
|       |              | Muscle | 0.31±0.02 | 0.38±0.08 | 0.50±0.09 | 0.08±0.01     | 0.17±0.04 | 1.01±0.03 | 0.08±0.01 | 0.12±0.01 | 0.18±0.06 |
| 4     | Cu           | Gills  | 0.11±0.03 | 0.09±0.01 | 0.13±0.08 | 0.02±0.01     | 0.02±0.01 | 0.09±0.01 | 0.09±0.01 | 0.12±0.02 | 0.32±0.11 |
|       |              | Kidney | 0.02±0.01 | 0.05±0.01 | 0.13±0.05 | BDL           | 0.01±0.00 | 1.16±0.07 | 0.10±0.01 | 0.11±0.01 | 0.17±0.06 |
|       |              | Liver  | BDL       | 0.06±0.01 | 0.16±0.07 | BDL           | BDL       | 0.10±0.01 | 0.07±0.01 | 0.85±0.07 | 0.02±0.01 |
|       |              | Muscle | BDL       | 0.02±0.01 | 0.03±0.03 | BDL           | BDL       | 0.02±0.01 | BDL       | 0.02±0.01 | 0.02±0.01 |
| 5     | Pb           | Gills  | 0.88±0.05 | 1.17±0.11 | 2.02±0.06 | 0.81±0.13     | 1.69±0.08 | 0.82±0.04 | 0.60±0.03 | 0.71±0.10 | 1.07±0.16 |
|       |              | Kidney | 0.61±0.03 | 1.12±0.18 | 1.32±0.06 | 0.42±0.05     | 1.06±0.20 | 0.70±0.08 | 0.40±0.03 | 0.51±0.07 | 0.80±0.08 |
|       |              | Liver  | 0.81±0.12 | 0.86±0.01 | 1.06±0.20 | 0.30±0.08     | 0.40±0.08 | 0.96±0.09 | 0.20±0.02 | 0.35±0.01 | 0.49±0.04 |
|       |              | Muscle | 0.06±0.02 | 0.03±0.01 | 0.05±0.02 | 0.05±0.06     | 0.05±0.02 | 0.07±0.01 | 0.03±0.01 | 0.08±0.01 | 0.14±0.07 |
| 6     | Ni           | Gills  | 1.81±0.03 | 1.84±0.01 | 2.55±0.51 | 1.38±0.20     | 3.31±0.16 | 1.85±0.09 | 0.93±0.06 | 1.12±0.16 | 1.26±0.08 |
|       |              | Kidney | 0.90±0.01 | 0.85±0.10 | 2.10±0.16 | 0.90±0.11     | 1.05±0.10 | 1.37±0.07 | 0.91±0.02 | 1.06±0.11 | 0.96±0.08 |
|       |              | Liver  | 0.99±0.10 | 0.94±0.11 | 1.37±0.14 | 0.72±0.11     | 1.24±0.17 | 1.15±0.08 | 0.79±0.01 | 0.90±0.04 | 0.95±0.04 |
|       |              | Muscle | 0.16±0.04 | 0.21±0.04 | 0.44±0.17 | 0.16±0.04     | 0.31±0.04 | 0.68±0.12 | 0.10±0.01 | 0.21±0.01 | 0.24±0.06 |
| 7     | Zn           | Gills  | 0.87±0.07 | 0.80±0.11 | 2.73±0.20 | 0.73±0.07     | 1.04±0.08 | 1.40±0.03 | 0.66±0.05 | 0.83±0.08 | 1.10±0.16 |
|       |              | Kidney | 0.59±0.06 | 0.70±0.01 | 1.31±0.14 | 0.40±0.08     | 0.87±0.05 | 0.79±0.10 | 0.40±0.01 | 0.49±0.04 | 0.97±0.14 |
|       |              | Liver  | 0.41±0.04 | 0.37±0.07 | 1.86±0.08 | 0.31±0.04     | 0.83±0.08 | 1.18±0.08 | 0.63±0.05 | 0.77±0.09 | 0.80±0.05 |
|       |              | Muscle | 0.20±0.01 | 0.37±0.12 | 0.59±0.07 | 0.12±0.04     | 0.10±0.01 | 0.21±0.04 | 0.06±0.01 | 0.09±0.01 | 0.05±0.01 |

\* n=5; Mean ± Standard Deviation; BDL – Below Detectable Level

Table 2. Bioaccumulation of heavy metals ( $\mu\text{g/g}$ ) in *Channa punctata* pre-monsoon (2015)

| S. No | Heavy metals | Sample | Cauvery   |           |           | Thamirabarani |           |           | Vaigai    |           |           |
|-------|--------------|--------|-----------|-----------|-----------|---------------|-----------|-----------|-----------|-----------|-----------|
|       |              |        | L         | M         | H         | L             | M         | H         | L         | M         | H         |
| 1     | As           | Gills  | 0.02±0.01 | 0.28±0.09 | 1.12±0.18 | 0.49±0.11     | 0.42±0.05 | 0.50±0.08 | 0.13±0.03 | 0.17±0.02 | 0.29±0.04 |
|       |              | Kidney | 0.05±0.01 | 0.18±0.09 | 0.88±0.13 | 0.37±0.06     | 0.53±0.17 | 0.42±0.05 | 0.11±0.02 | 0.12±0.02 | 0.10±0.01 |
|       |              | Liver  | 0.03±0.01 | 0.11±0.02 | 0.58±0.06 | 0.10±0.01     | 0.77±0.14 | 0.20±0.01 | 0.03±0.02 | 0.10±0.01 | 0.08±0.01 |
|       |              | Muscle | 0.03±0.01 | 0.08±0.02 | 0.08±0.01 | 0.03±0.01     | 0.10±0.01 | 0.18±0.08 | 0.02±0.01 | 0.04±0.01 | 0.03±0.01 |
| 2     | Cd           | Gills  | 0.04±0.01 | 0.05±0.01 | 0.03±0.02 | 0.02±0.01     | 0.04±0.04 | 0.04±0.04 | 0.02±0.01 | 0.02±0.01 | 0.03±0.01 |
|       |              | Kidney | 0.03±0.02 | 0.04±0.01 | 0.07±0.04 | BDL           | 0.03±0.01 | BDL       | BDL       | BDL       | 0.03±0.01 |
|       |              | Liver  | BDL       | 0.02±0.01 | 0.02±0.01 | BDL           | 0.02±0.01 | BDL       | BDL       | BDL       | BDL       |
|       |              | Muscle | BDL       | 0.02±0.01 | 0.05±0.01 | BDL           | 0.03±0.01 | 0.01±0    | BDL       | BDL       | BDL       |
| 3     | Cr           | Gills  | 0.74±0.06 | 0.88±0.14 | 1.22±0.04 | 0.31±0.08     | 0.79±0.11 | 3.10±0.16 | 0.86±0.07 | 1.10±0.10 | 1.34±0.06 |
|       |              | Kidney | 0.37±0.07 | 0.69±0.07 | 1.01±0.12 | 0.21±0.05     | 0.52±0.06 | 0.89±0.04 | 0.83±0.06 | 1.01±0.12 | 1.02±0.07 |
|       |              | Liver  | 1.14±0.30 | 0.90±0.12 | 1.02±0.06 | 0.18±0.07     | 0.37±0.06 | 0.80±0.06 | 0.62±0.03 | 0.80±0.13 | 1.31±0.11 |
|       |              | Muscle | 0.33±0.17 | 0.31±0.05 | 1.13±0.14 | 0.32±0.06     | 0.23±0.08 | 0.08±0.01 | 0.08±0.01 | 0.16±0.04 | 0.22±0.04 |
| 4     | Cu           | Gills  | 0.10±0.01 | 0.08±0.01 | 0.10±0.01 | 0.02±0.01     | 0.02±0.01 | 0.10±0.01 | 0.09±0.01 | 0.11±0.01 | 0.30±0.03 |
|       |              | Kidney | 0.02±0.01 | 0.07±0.03 | 0.15±0.06 | BDL           | 0.02±0.01 | 1.04±0.04 | 0.08±0.02 | 0.10±0.01 | 0.20±0.02 |
|       |              | Liver  | BDL       | 0.06±0.03 | 0.03±0.01 | BDL           | BDL       | 0.08±0.01 | BDL       | 0.98±0.06 | 0.04±0.01 |
|       |              | Muscle | BDL       | 0.03±0.02 | 0.02±0.01 | BDL           | BDL       | 0.02±0.01 | BDL       | 0.03±0.01 | 0.03±0.01 |
| 5     | Pb           | Gills  | 0.80±0.13 | 0.88±0.06 | 0.97±0.08 | 0.72±0.04     | 0.76±0.07 | 1.11±0.18 | 0.60±0.04 | 0.73±0.08 | 1.06±0.05 |
|       |              | Kidney | 0.47±0.02 | 0.57±0.08 | 0.70±0.11 | 0.59±0.09     | 0.88±0.06 | 1.10±0.16 | 0.39±0.06 | 0.51±0.03 | 0.89±0.02 |
|       |              | Liver  | 0.52±0.18 | 0.81±0.12 | 1.07±0.23 | 0.32±0.06     | 0.85±0.17 | 1.13±0.16 | 0.20±0.02 | 0.51±0.11 | 0.59±0.04 |
|       |              | Muscle | 0.06±0.01 | 0.08±0.01 | 0.20±0.02 | 0.02±0.01     | 0.03±0.01 | 0.10±0.01 | 0.05±0.02 | 0.08±0.01 | 0.15±0.06 |
| 6     | Ni           | Gills  | 1.77±0.15 | 2.33±0.45 | 2.38±0.10 | 1.37±0.07     | 2.30±0.35 | 2.44±0.01 | 1.00±0.11 | 1.15±0.04 | 1.30±0.10 |
|       |              | Kidney | 0.91±0.04 | 1.02±0.06 | 1.28±0.40 | 1.10±0.18     | 2.07±0.21 | 1.92±0.08 | 0.04±0.01 | 0.60±0.71 | 1.01±0.08 |
|       |              | Liver  | 0.85±0.10 | 0.90±0.04 | 1.38±0.23 | 0.87±0.07     | 1.45±0.16 | 1.96±0.07 | 0.78±0.05 | 0.96±0.05 | 1.26±0.09 |
|       |              | Muscle | 0.15±0.01 | 0.23±0.05 | 0.40±0.08 | 0.21±0.03     | 0.44±0.15 | 0.60±0.03 | 0.15±0.03 | 0.25±0.06 | 0.34±0.05 |
| 7     | Zn           | Gills  | 1.07±0.18 | 1.11±0.17 | 2.42±0.05 | 0.84±0.08     | 0.96±0.06 | 0.97±0.07 | 0.60±0.03 | 0.81±0.02 | 1.33±0.07 |
|       |              | Kidney | 0.81±0.13 | 0.98±0.12 | 1.12±0.16 | 0.79±0.14     | 0.91±0.10 | 0.91±0.10 | 0.41±0.03 | 0.59±0.09 | 1.02±0.06 |
|       |              | Liver  | 0.62±0.05 | 0.81±0.12 | 1.07±0.12 | 0.40±0.11     | 0.81±0.11 | 0.78±0.07 | 0.61±0.09 | 0.81±0.11 | 0.90±0.01 |
|       |              | Muscle | 0.21±0.03 | 0.47±0.21 | 0.58±0.13 | 0.09±0.01     | 0.10±0.01 | 0.11±0.02 | 0.08±0.01 | 0.11±0.02 | 0.18±0.01 |

\* n=5; Mean ± Standard Deviation; BDL – Below Detectable Level

Table 3. Bioaccumulation of heavy metals ( $\mu\text{g/g}$ ) in *Channa striata* post-monsoon (2015).

| S. No | Heavy metals | Sample | Cauvery   |           |            | Thamirabarani |           |            | Vaigai    |           |           |
|-------|--------------|--------|-----------|-----------|------------|---------------|-----------|------------|-----------|-----------|-----------|
|       |              |        | L         | M         | H          | L             | M         | H          | L         | M         | H         |
| 1     | As           | Gills  | 0.25±0.06 | 0.82±0.15 | 0.88±0.05  | 0.43±0.05     | 0.21±0.04 | 0.32±0.07  | 0.20±0.01 | 0.87±0.04 | 1.10±0.19 |
|       |              | Kidney | 0.48±0.08 | 0.50±0.03 | 0.18±0.08  | 0.23±0.08     | 0.25±0.06 | 0.28±0.04  | 0.10±0.01 | 0.29±0.02 | 0.77±0.08 |
|       |              | Liver  | 0.87±0.07 | 0.37±0.06 | 0.52±0.06  | 0.09±0.01     | 0.14±0.04 | 0.39±0.11  | 0.15±0.05 | 0.20±0.02 | 1.05±0.32 |
|       |              | Muscle | BDL       | 0.08±0.02 | 0.12±0.04  | 0.04±0.01     | 0.05±0.01 | 0.08±0.02  | 0.05±0.02 | 0.07±0.01 | 0.11±0.03 |
| 2     | Cd           | Gills  | 0.05±0.02 | BDL       | 0.12±0.04  | BDL           | 0.03±0.01 | 0.04±0.01  | BDL       | 0.04±0.01 | 0.03±0.02 |
|       |              | Kidney | BDL       | BDL       | 0.05±0.02  | BDL           | 0.02±0.01 | 0.06±0.01  | 0.02±0.01 | 0.05±0.02 | 0.02±0.01 |
|       |              | Liver  | 0.02±0.01 | BDL       | 0.07±0.02  | BDL           | BDL       | 0.06±0.03  | BDL       | 0.03±0.01 | BDL       |
|       |              | Muscle | BDL       | BDL       | BDL        | BDL           | BDL       | BDL        | BDL       | BDL       | BDL       |
| 3     | Cr           | Gills  | 1.05±0.15 | 1.01±0.03 | 1.33±0.13  | 0.98±0.06     | 1.17±0.07 | 1.52±0.06  | 0.89±0.03 | 1.69±0.07 | 2.48±0.55 |
|       |              | Kidney | 0.76±0.11 | 0.82±0.15 | 0.99±0.10  | 0.84±0.08     | 1.10±0.18 | 1.22±0.14  | 0.83±0.06 | 1.47±0.08 | 1.46±0.11 |
|       |              | Liver  | 0.53±0.16 | 0.40±0.03 | 0.85±0.08  | 0.49±0.11     | 0.87±0.08 | 1.08±0.16  | 0.61±0.04 | 1.08±0.22 | 1.20±0.14 |
|       |              | Muscle | 0.18±0.08 | 0.30±0.08 | 0.66±0.11  | 0.23±0.07     | 0.39±0.06 | 0.51±0.04  | 0.38±0.06 | 0.82±0.16 | 1.01±0.13 |
| 4     | Cu           | Gills  | 0.85±0.10 | 2.03±0.06 | 3.20±0.13  | 0.20±0.02     | 0.30±0.03 | 0.61±0.03  | 0.72±0.05 | 0.30±0.03 | 0.41±0.02 |
|       |              | Kidney | 0.77±0.11 | 1.96±0.07 | 1.37±0.07  | BDL           | 0.20±0.01 | 0.51±0.04  | 0.49±0.10 | 0.22±0.13 | 0.22±0.04 |
|       |              | Liver  | BDL       | 0.99±0.09 | 1.15±0.08  | BDL           | BDL       | 0.04±0.02  | BDL       | 0.10±0.01 | 0.09±0.02 |
|       |              | Muscle | BDL       | BDL       | 1.12±0.18  | BDL           | BDL       | 0.23±0.06  | BDL       | 0.03±0.02 | 0.07±0.03 |
| 5     | Pb           | Gills  | 0.86±0.17 | 0.82±0.04 | 1.02±0.06  | 0.08±0.01     | 0.78±0.08 | 0.93±0.06  | 1.22±0.33 | 1.21±0.19 | 1.12±0.04 |
|       |              | Kidney | 1.15±0.24 | 0.88±0.06 | 0.81±0.13  | 0.06±0.01     | 0.87±0.08 | 0.79±0.11  | 0.90±0.12 | 1.13±0.30 | 0.86±0.11 |
|       |              | Liver  | 1.02±0.13 | 0.97±0.08 | 1.22±0.15  | 0.11±0.02     | 0.89±0.14 | 1.00±0.11  | 0.72±0.04 | 0.43±0.16 | 0.47±0.08 |
|       |              | Muscle | 0.08±0.01 | 0.19±0.06 | 0.36±0.09  | BDL           | BDL       | 0.05±0.01  | BDL       | 0.36±0.09 | 0.40±0.08 |
| 6     | Ni           | Gills  | 1.90±0.08 | 2.04±0.12 | 2.53±0.07  | 2.18±0.23     | 2.84±0.05 | 2.99±0.07  | 1.27±0.41 | 3.07±0.20 | 3.07±0.78 |
|       |              | Kidney | 1.81±0.03 | 1.90±0.12 | 1.71±0.09  | 1.43±0.16     | 1.38±0.08 | 1.88±0.16  | 1.08±0.23 | 1.26±0.11 | 1.29±0.10 |
|       |              | Liver  | 1.10±0.16 | 1.16±0.88 | 2.01±0.11  | 1.35±0.13     | 1.24±0.06 | 1.13±0.06  | 0.39±0.09 | 1.13±0.11 | 2.15±0.25 |
|       |              | Muscle | 0.11±0.03 | 0.28±0.09 | 0.89±0.04  | 0.80±0.13     | 0.74±0.09 | 1.18±0.36  | 0.19±0.06 | 1.01±0.13 | 1.04±0.08 |
| 7     | Zn           | Gills  | 0.27±0.08 | 0.46±0.12 | 20.76±0.59 | 0.16±0.05     | 4.36±0.21 | 16.78±2.21 | 0.37±0.08 | 5.71±0.42 | 9.67±0.79 |
|       |              | Kidney | 0.18±0.05 | 0.32±0.04 | 9.75±0.56  | 0.15±0.05     | 4.01±0.13 | 4.80±0.81  | 0.18±0.10 | 0.93±0.15 | 0.41±0.13 |
|       |              | Liver  | 0.11±0.03 | 0.23±0.08 | 17.31±1.31 | 0.24±0.04     | 2.52±0.12 | 4.10±0.16  | 0.66±0.81 | 0.47±0.08 | 0.46±0.09 |
|       |              | Muscle | 0.16±0.11 | 0.10±0.04 | 16.47±1.95 | 0.08±0.01     | 0.02±0.01 | 0.98±0.08  | 0.60±0.71 | 0.64±0.77 | 1.30±0.14 |

\* n=5; Mean ± Standard Deviation; BDL – Below Detectable Level

Table 4. Bioaccumulation of heavy metals ( $\mu\text{g/g}$ ) in *Channa punctata* post-monsoon (2015).

| S. No | Heavy metals | Sample | Cauvery   |           |            | Thamirabarani |           |            | Vaigai    |           |             |
|-------|--------------|--------|-----------|-----------|------------|---------------|-----------|------------|-----------|-----------|-------------|
|       |              |        | L         | M         | H          | L             | M         | H          | L         | M         | H           |
| 1     | As           | Gills  | 0.22±0.04 | 0.73±0.07 | 1.12±0.28  | 0.51±0.04     | 0.30±0.08 | 0.51±0.04  | 0.30±0.02 | 1.00±0.11 | 0.76±0.07   |
|       |              | Kidney | 0.15±0.06 | 0.59±0.06 | 0.84±0.08  | 0.27±0.08     | 0.19±0.08 | 0.44±0.08  | 0.26±0.02 | 0.88±0.14 | 0.68±0.08   |
|       |              | Liver  | 0.13±0.05 | 0.49±0.11 | 1.07±0.23  | 0.15±0.01     | 0.13±0.07 | 0.56±0.07  | 0.19±0.03 | 0.71±0.03 | 0.55±0.15   |
|       |              | Muscle | BDL       | 0.06±0.02 | 0.11±0.04  | 0.12±0.06     | 0.18±0.08 | 0.26±0.06  | 0.05±0.02 | 0.22±0.04 | 0.26±0.05   |
| 2     | Cd           | Gills  | 0.06±0.02 | 0.03±0.01 | 0.11±0.03  | 0.02±0.01     | 0.05±0.04 | 0.02±0.01  | 0.07±0.01 | BDL       | 0.05±0.01   |
|       |              | Kidney | BDL       | BDL       | 0.16±0.05  | BDL           | 0.05±0.06 | 0.03±0.01  | 0.04±0.01 | BDL       | 0.07±0.01   |
|       |              | Liver  | 0.02±0.01 | BDL       | 0.04±0.03  | BDL           | BDL       | 0.03±0.01  | BDL       | 0.02±0.01 | 0.01± -     |
|       |              | Muscle | BDL       | BDL       | BDL        | BDL           | BDL       | BDL        | BDL       | BDL       | BDL         |
| 3     | Cr           | Gills  | 0.76±0.03 | 0.98±0.08 | 1.24±0.08  | 0.87±0.06     | 1.11±0.17 | 1.09±0.01  | 1.06±0.20 | 1.85±0.08 | 2.23±0.16   |
|       |              | Kidney | 0.42±0.01 | 0.57±0.08 | 0.71±0.03  | 0.82±0.11     | 1.19±0.10 | 1.03±0.15  | 0.77±0.06 | 1.99±0.06 | 1.90±0.17   |
|       |              | Liver  | 1.72±0.02 | 2.00±0.11 | 4.35±0.46  | 0.60±0.03     | 0.85±0.18 | 0.87±0.08  | 0.61±0.09 | 1.69±0.16 | 2.05±0.18   |
|       |              | Muscle | 0.28±0.02 | 0.37±0.08 | 0.48±0.06  | 0.18±0.09     | 0.27±0.07 | 0.42±0.05  | 0.37±0.07 | 0.70±0.12 | 1.14±0.29   |
| 4     | Cu           | Gills  | 0.98±0.08 | 1.62±0.44 | 1.82±0.14  | 0.17±0.04     | 0.43±0.15 | 0.60±0.03  | 0.06±0.01 | 0.41±0.02 | 0.48±0.08   |
|       |              | Kidney | 0.71±0.11 | 0.94±0.14 | 1.08±0.21  | BDL           | 0.18±0.08 | 0.45±0.06  | BDL       | 0.27±0.06 | 21.67±30.17 |
|       |              | Liver  | BDL       | 0.44±0.17 | 0.53±0.07  | BDL           | 0.14±0.07 | 0.16±0.05  | BDL       | 0.11±0.03 | 18.61±26.01 |
|       |              | Muscle | BDL       | 0.20±0.04 | 0.28±0.08  | BDL           | BDL       | 0.08±0.01  | BDL       | BDL       | 0.05±0.01   |
| 5     | Pb           | Gills  | 0.64±0.03 | 0.90±0.04 | 1.27±0.11  | 0.14±0.06     | 0.68±0.08 | 1.12±0.21  | 0.98±0.09 | 1.18±0.08 | 1.13±0.30   |
|       |              | Kidney | 0.47±0.03 | 0.81±0.02 | 1.15±0.09  | 0.05±0.03     | 0.61±0.02 | 0.40±0.07  | 0.04±0.01 | 0.87±0.04 | 0.89±0.13   |
|       |              | Liver  | 1.03±0.06 | 1.09±0.18 | 1.81±0.12  | 0.05±0.04     | 0.11±0.03 | 0.17±0.04  | 0.65±0.06 | 0.77±0.13 | 1.08±0.37   |
|       |              | Muscle | 0.14±0.08 | 0.21±0.03 | 0.40±0.07  | BDL           | BDL       | 0.07±0.03  | BDL       | 0.38±0.06 | 0.46±0.26   |
| 6     | Ni           | Gills  | 2.00±0.06 | 1.96±0.07 | 2.59±0.09  | 1.41±0.09     | 2.29±0.38 | 2.00±0.11  | 1.10±0.16 | 3.46±0.63 | 2.67±0.31   |
|       |              | Kidney | 1.19±0.11 | 1.07±0.04 | 1.76±0.16  | 1.51±0.12     | 1.30±0.03 | 1.41±0.08  | 0.66±0.07 | 2.70±0.29 | 1.96±0.19   |
|       |              | Liver  | 1.03±0.10 | 0.98±0.08 | 2.44±0.69  | 1.08±0.15     | 1.19±0.25 | 2.00±0.01  | 0.47±0.07 | 1.44±0.17 | 2.09±0.21   |
|       |              | Muscle | 0.15±0.06 | 0.51±0.13 | 1.08±0.22  | 0.42±0.06     | 1.10±0.25 | 0.41±0.04  | 0.27±0.06 | 0.90±0.12 | 1.09±0.16   |
| 7     | Zn           | Gills  | 0.20±0.01 | 0.25±0.03 | 25.85±5.20 | 0.21±0.09     | 5.63±1.13 | 11.53±0.64 | 0.27±0.06 | 5.87±0.83 | 9.78±0.80   |
|       |              | Kidney | 0.26±0.05 | 0.16±0.03 | 18.74±1.16 | 0.13±0.06     | 4.33±0.58 | 12.58±0.62 | 0.37±0.08 | 5.17±0.37 | 11.13±1.34  |
|       |              | Liver  | 0.21±0.04 | 0.07±0.01 | 47.57±2.32 | 0.12±0.05     | 4.67±0.93 | 16.26±2.94 | 0.20±0.01 | 3.92±1.06 | 8.44±1.58   |
|       |              | Muscle | 0.04±0.01 | 0.07±0.01 | 16.33±2.26 | 0.04±0.04     | 3.27±0.26 | 6.88±1.36  | 0.09±0.01 | 2.70±0.45 | 5.09±1.28   |

\* n=5; Mean ± Standard Deviation; BDL – Below Detectable Level
